# Supplementary material for: Chiral separation of aromatic amino acids by capillary electrophoresis using sulphated β-cyclodextrin as a single chiral selector: an experimental and computational study
Source: Royal Society of Chemistry journal article supplement (doi:10.1039/d5ra07410j), 2026-01-01
Supplement: d5ra07410j1.pdf [file d5ra07410j1.pdf]

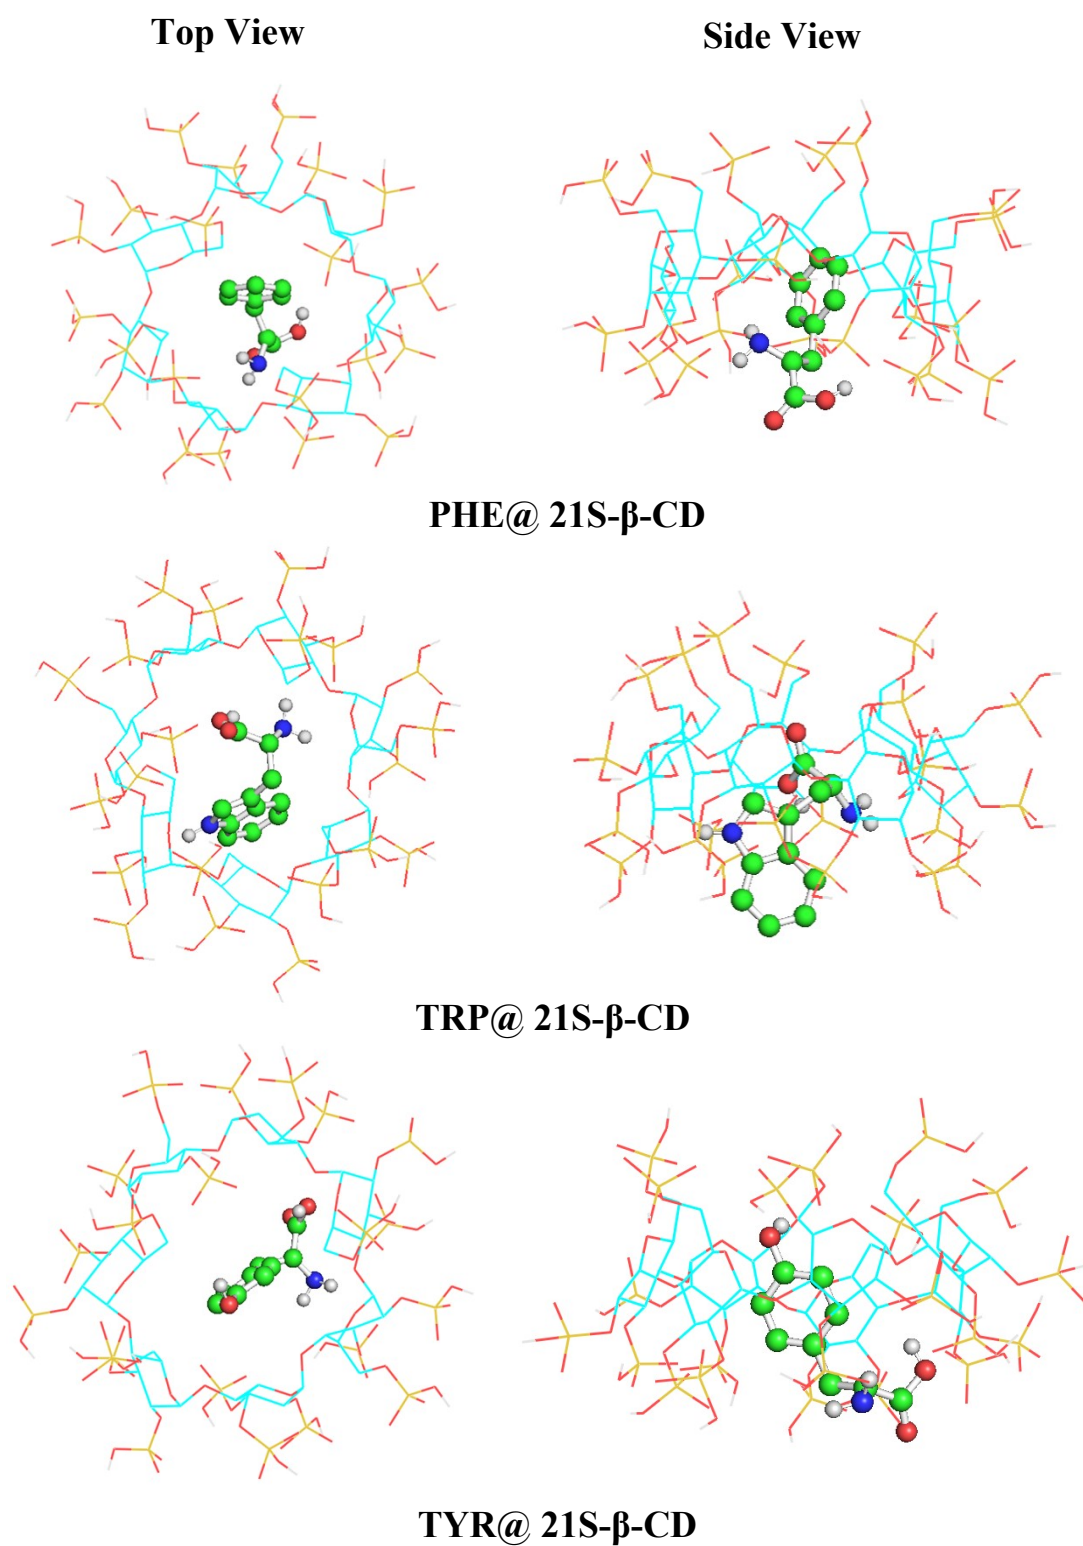

**Figure 1S:** 3D structures of the diastereomeric complexes of three AAs and 21S-β-CD

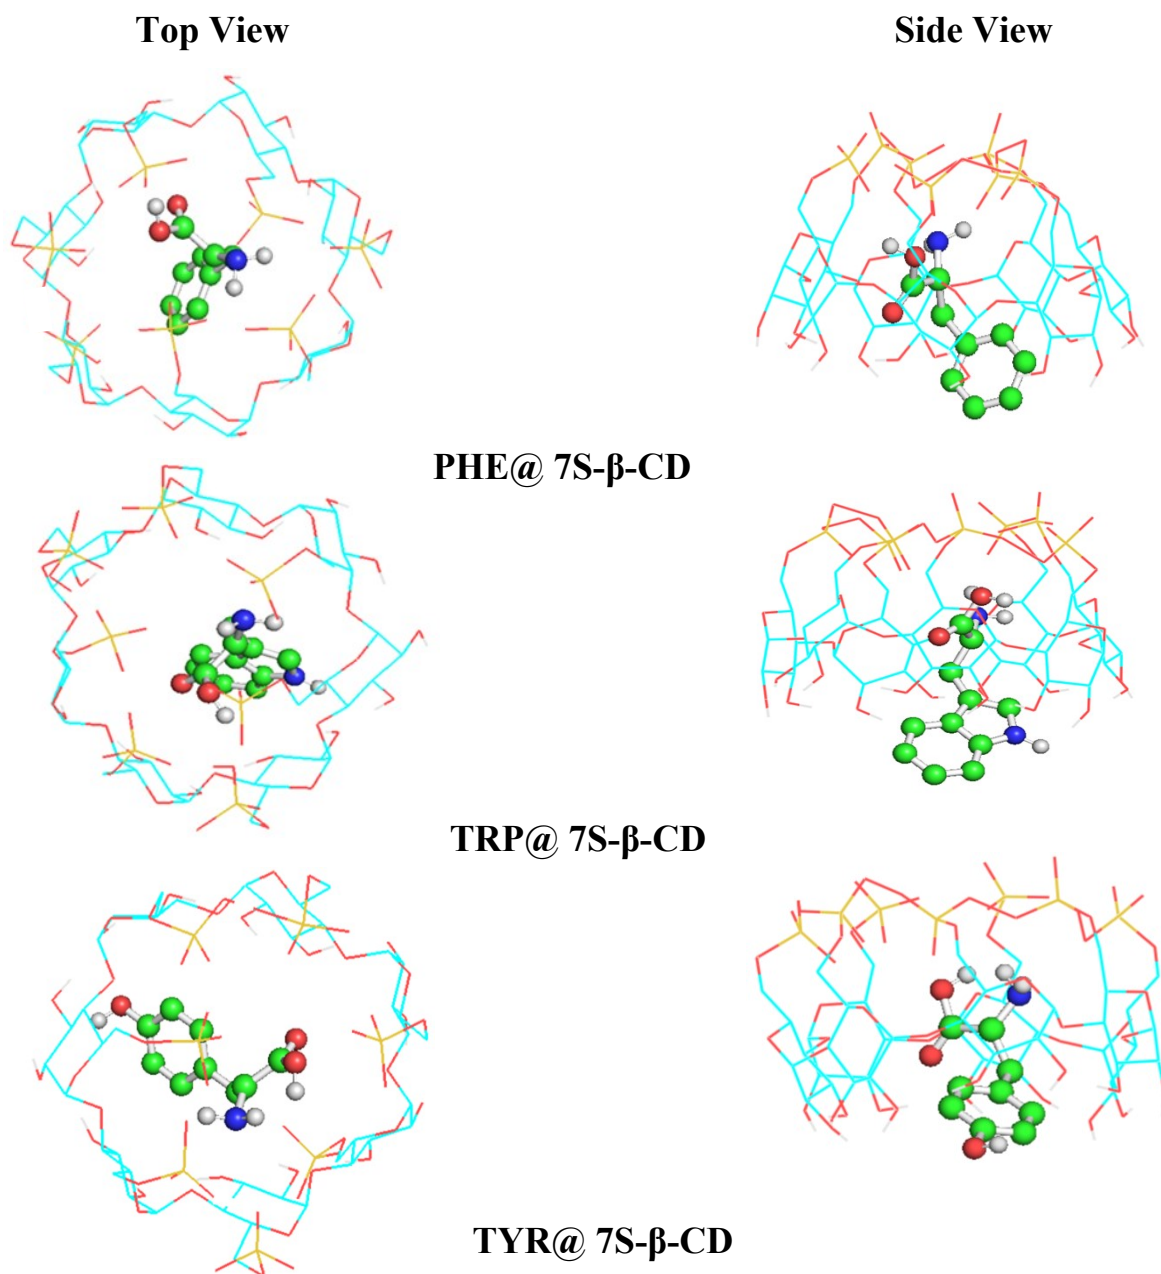

**Figure 2S:** Pictorial representation of diastereomeric complexes of aminoacids and 7S-β-CD

Table 1S. Resolution, separation factor and Theoretical plate numbers obtained as the optimum conditions

| Parameters/<br>analyte | Resolution (Rs) | Selectivity factor ( $\alpha$ ) | Theoretical plate numbers<br>(N) first enantiomer |
|------------------------|-----------------|---------------------------------|---------------------------------------------------|
| D/L-TRP                | 4.02            | 1.02                            | 35268.84                                          |
| D/L-TYR                | 10.5            | 1.10                            | 18235.8016                                        |
| D/L-PHE                | 4.75            | 1.08                            | 16723.6624                                        |
